# Supplementary material for: Ice content and interannual water storage changes of an active rockglacier in the dry Andes of Argentina
Source: Copernicus journal article supplement (doi:10.5194/tc-2020-29), 2020-03-18
Supplement: Supplementary file 1 [file tc-2020-29-supplement.pdf]

*Supplement of*

**Ice content and interannual storage changes of an active rock glacier in the dry Andes of Argentina**

5 C. Halla et al.

*Correspondence to:* christian.halla@uni-bonn.de

**S1 Four phase model (4PM) scenarios of Dos Lenguas rock glacier**

#### 4PM Input Data

Field data Dos Linguas cross-profile C1:  
 Electrical resistivity tomography (ERT), 23.02.2017  
 Refraction seismic tomography (SRT), 24.02.2017  
 0 m depth  $\approx$  4470 m asl  
 Used 4PM parameters:  
 Mixed  $\Phi$ ,  $\rho_w = 30, 50, 100 \text{ \&Omega}m$   
 $v_{sw} = 330 \text{ ms}^{-1}$ ,  $v_{water} = 1500 \text{ ms}^{-1}$ ,  $v_{ice} = 3500 \text{ ms}^{-1}$   
 Archie's law:  $a = 1$ ,  $m = 2$ ,  $n = 2$

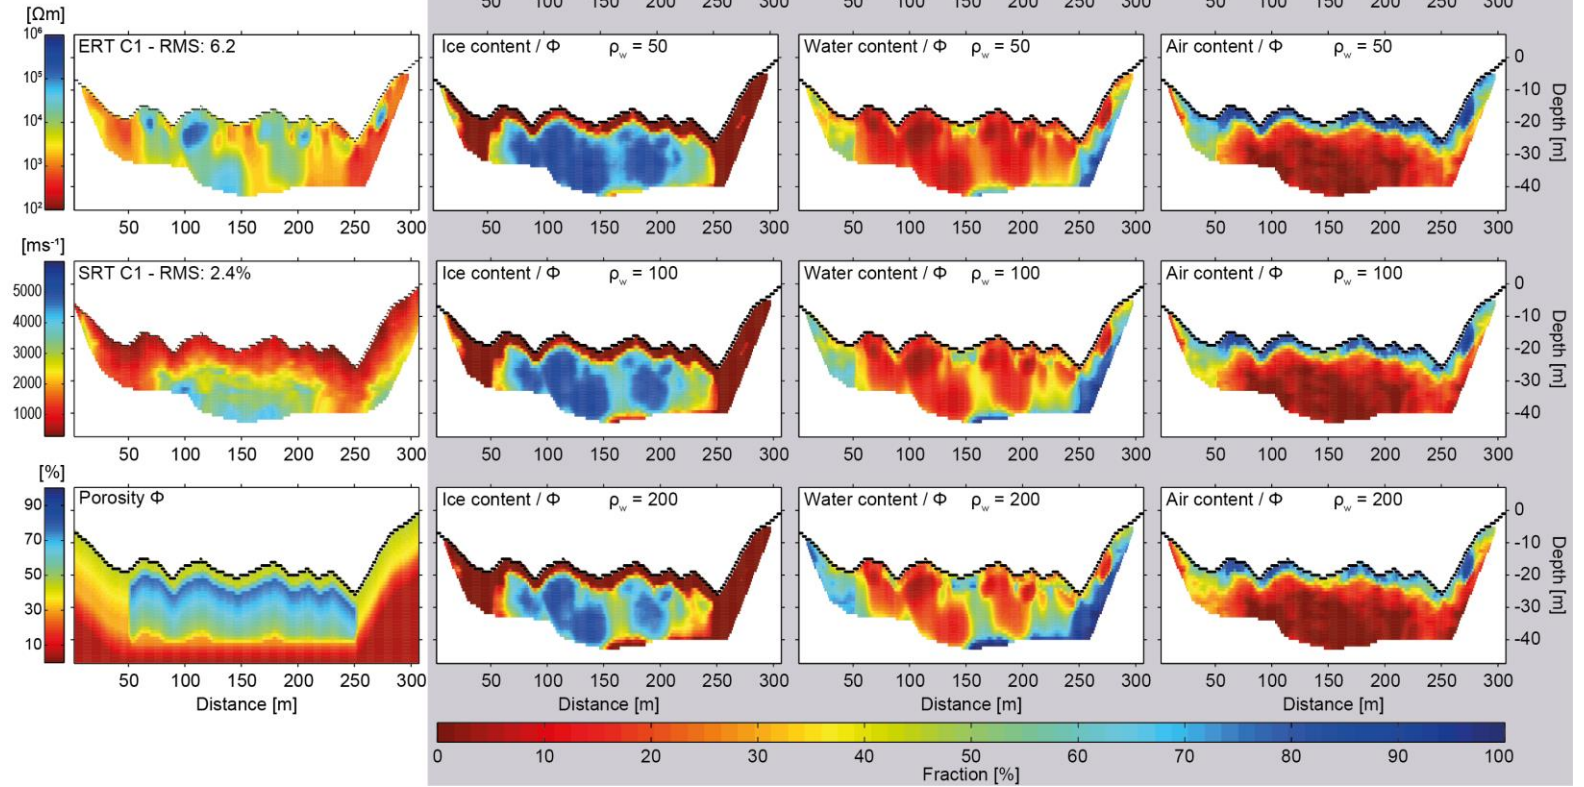

10 Fig. S 1: 4PM results of cross-profile C1 for the mixed porosity model. Ice, water and air content per porosity ( $\Phi$ ) are given for four pore water resistivities ( $\rho_w = 30, 50, 100, 200 \text{ \&Omega}m$ ).

## 4PM Input Data

Field data Dos Lenguas cross-profile C1:  
 Electrical resistivity tomography (ERT), 23.02.2017  
 Refraction seismic tomography (SRT), 24.02.2017  
 0 m depth  $\approx$  4470 m asl  
 Used 4PM parameters:  
 $\Phi = 70\%$ ,  $\rho_w = 30, 50, 100 \text{ \& } 200 \text{ \Omega m}$   
 $v_{air} = 330 \text{ ms}^{-1}$ ,  $v_{water} = 1500 \text{ ms}^{-1}$ ,  $v_{ice} = 3500 \text{ ms}^{-1}$   
 Archie's law:  $a = 1$ ,  $m = 2$ ,  $n = 2$

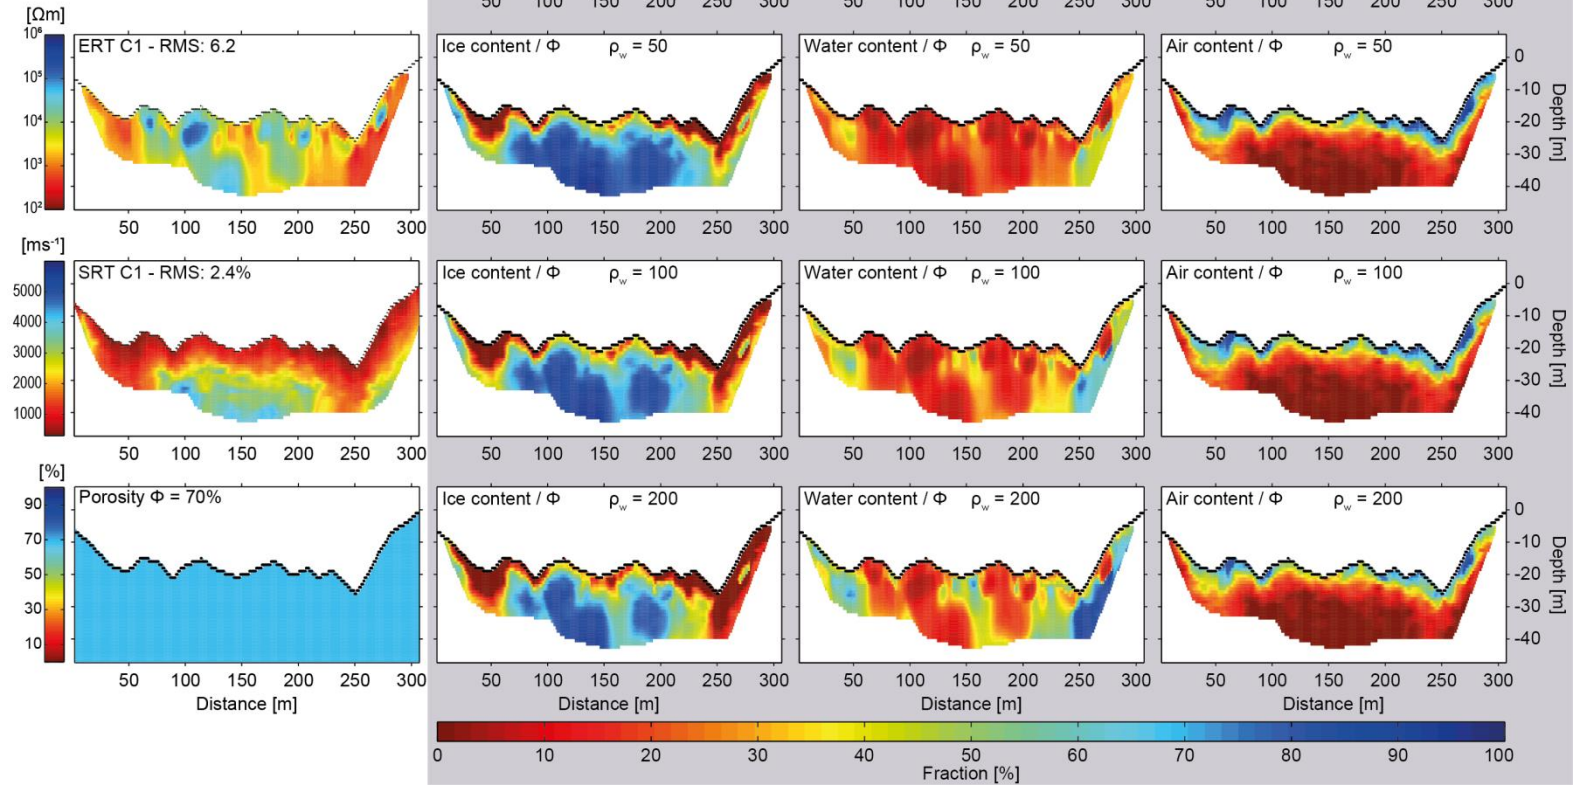

Fig. S 2: 4PM results of cross-profile C1 for the 70% porosity model. Ice, water and air content per porosity ( $\Phi$ ) are given for four pore water resistivities ( $\rho_w = 30, 50, 100, 200 \text{ \Omega m}$ ).

## 4PM Input Data

Field data Dos Lenguas cross-profile C1:  
 Electrical resistivity tomography (ERT), 23.02.2017  
 Refraction seismic tomography (SRT), 24.02.2017  
 0 m depth  $\approx$  4470 m asl  
 Used 4PM parameters:  
 $\Phi = 50\%$ ,  $\rho_w = 30, 50, 100 \text{ \& } 200 \text{ \Omega m}$   
 $v_{air} = 330 \text{ ms}^{-1}$ ,  $v_{water} = 1500 \text{ ms}^{-1}$ ,  $v_{ice} = 3500 \text{ ms}^{-1}$   
 Archie's law:  $a = 1$ ,  $m = 2$ ,  $n = 2$

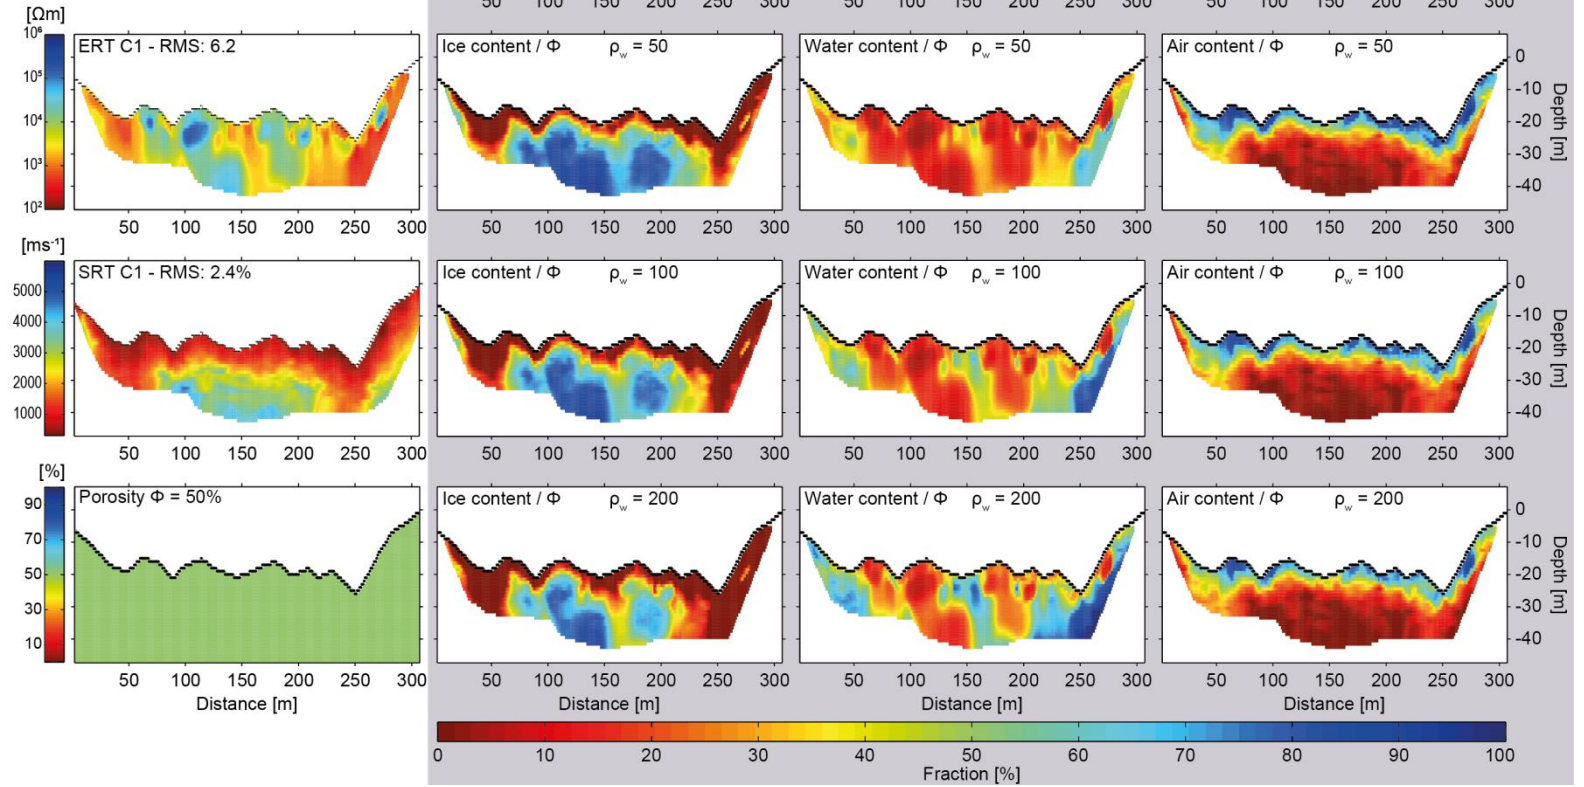

15

Fig. S 3: 4PM results of cross-profile C1 for the 50% porosity model. Ice, water and air content per porosity ( $\Phi$ ) are given for four pore water resistivities ( $\rho_w = 30, 50, 100, 200 \text{ \Omega m}$ ).



#### 4PM Input Data

Field data Dos Lenguas cross-profile C1:  
 Electrical resistivity tomography (ERT), 23.02.2017  
 Refraction seismic tomography (SRT), 24.02.2017  
 0m depth = 4470 m asl  
 Used 4PM parameters:  
 $\Phi = 30\%$ ,  $\rho_w = 30, 50, 100 \text{ \& } 200 \text{ \Omega m}$   
 $v_{sw} = 330 \text{ ms}^{-1}$ ,  $v_{water} = 1500 \text{ ms}^{-1}$ ,  $v_{ice} = 3500 \text{ ms}^{-1}$   
 Archie's law:  $a = 1$ ,  $m = 2$ ,  $n = 2$

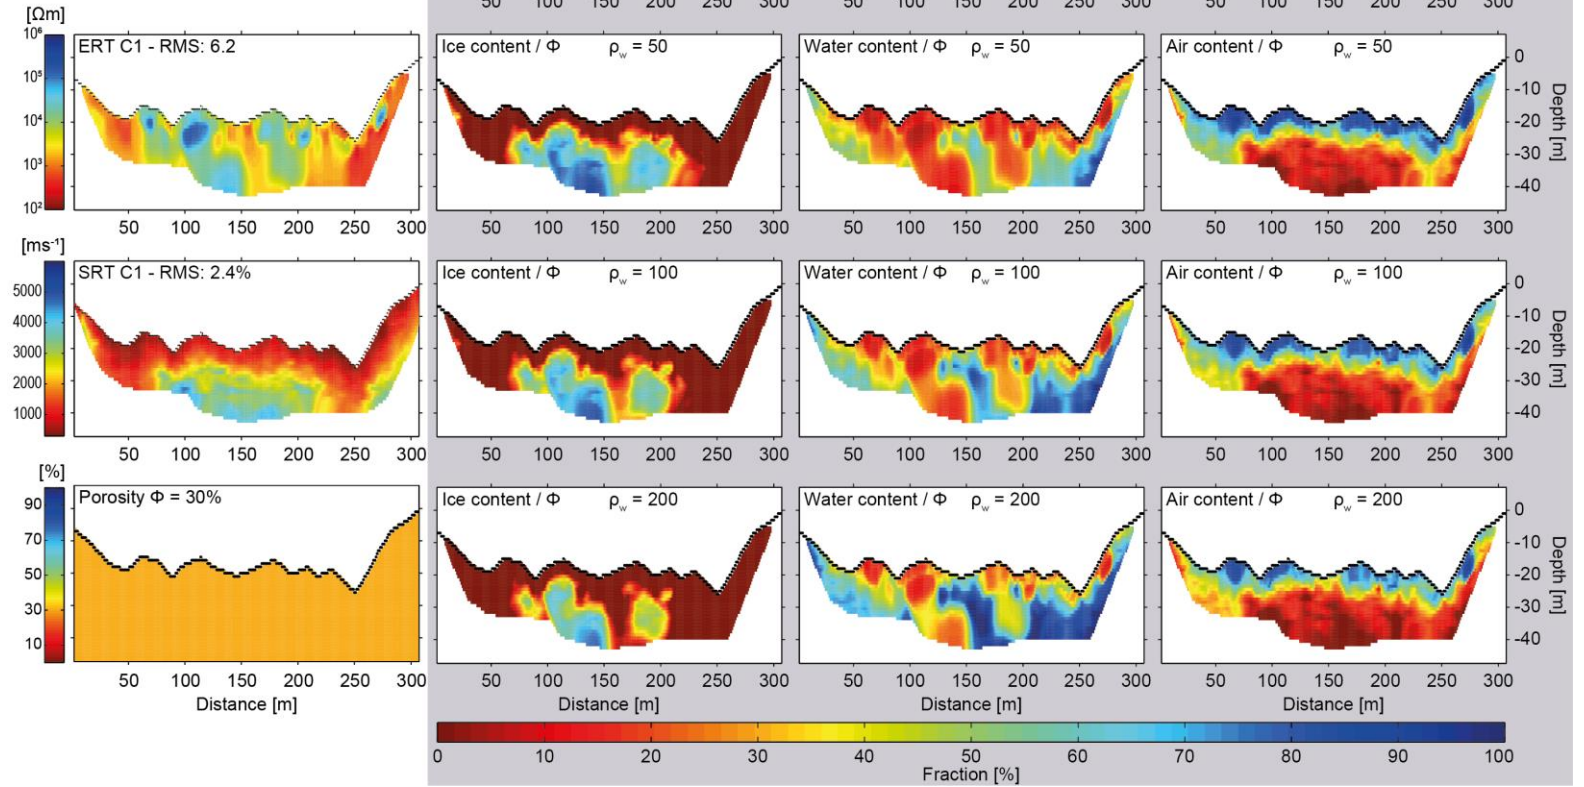

20 Fig. S 4: 4PM results of cross-profile C1 for the 30% porosity model. Ice, water and air content per porosity ( $\Phi$ ) are given for four pore water resistivities ( $\rho_w = 30, 50, 100, 200 \text{ \Omega m}$ ).

#### 4PM Input Data

Field data Dos Lunguas cross-profile C2:  
 Electrical resistivity tomography (ERT), 02.03.2017  
 Refraction seismic tomography (SRT), 02.03.2017  
 0m depth = 4372 m asl

Used 4PM parameters:  
 mixed  $\Phi = 70\%$ ,  $\rho_w = 30, 50, 100 \text{ \& } 200 \text{ \Omega m}$   
 $v_{sw} = 330 \text{ ms}^{-1}$ ,  $v_{water} = 1500 \text{ ms}^{-1}$ ,  $v_{ice} = 3500 \text{ ms}^{-1}$   
 Archie's law:  $a = 1$ ,  $m = 2$ ,  $n = 2$

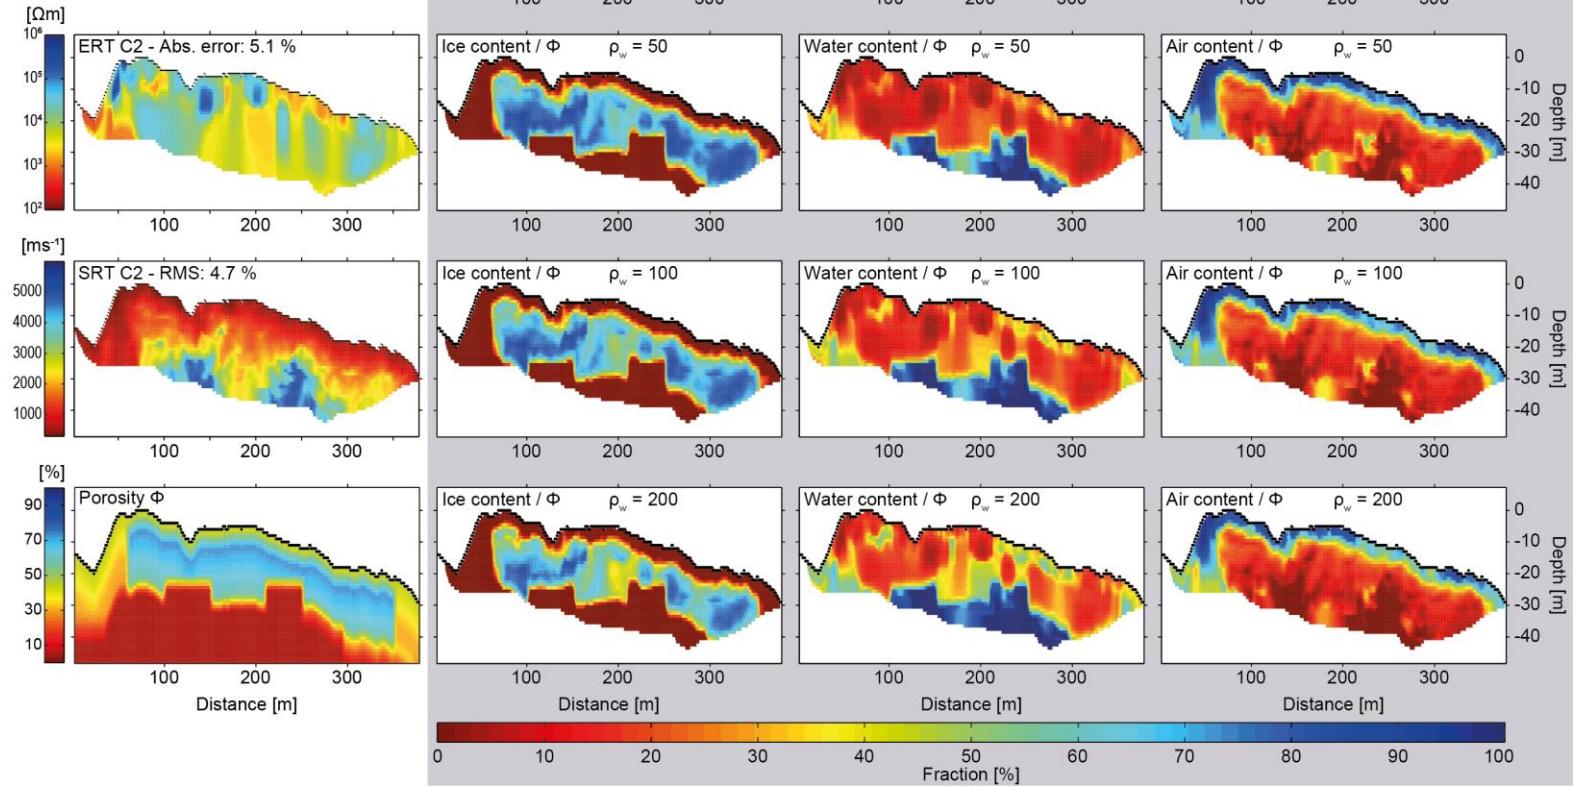

Fig. S 5: 4PM results of cross-profile C2 for the mixed porosity model. Ice, water and air content per porosity ( $\Phi$ ) are given for four pore water resistivities ( $\rho_w = 30, 50, 100, 200 \text{ \Omega m}$ ).

#### 4PM Input Data

Field data Dos Lenguas cross-profile C2:  
 Electrical resistivity tomography (ERT), 02.03.2017  
 Refraction seismic tomography (SRT), 02.03.2017  
 0m depth = 4372 m asl  
 Used 4PM parameters:  
 $\Phi = 70\%$ ,  $\rho_w = 30, 50, 100 \text{ \&Omega;m}$   
 $v_{sw} = 330 \text{ ms}^{-1}$ ,  $v_{water} = 1500 \text{ ms}^{-1}$ ,  $v_{ice} = 3500 \text{ ms}^{-1}$   
 Archie's law:  $a = 1$ ,  $m = 2$ ,  $n = 2$

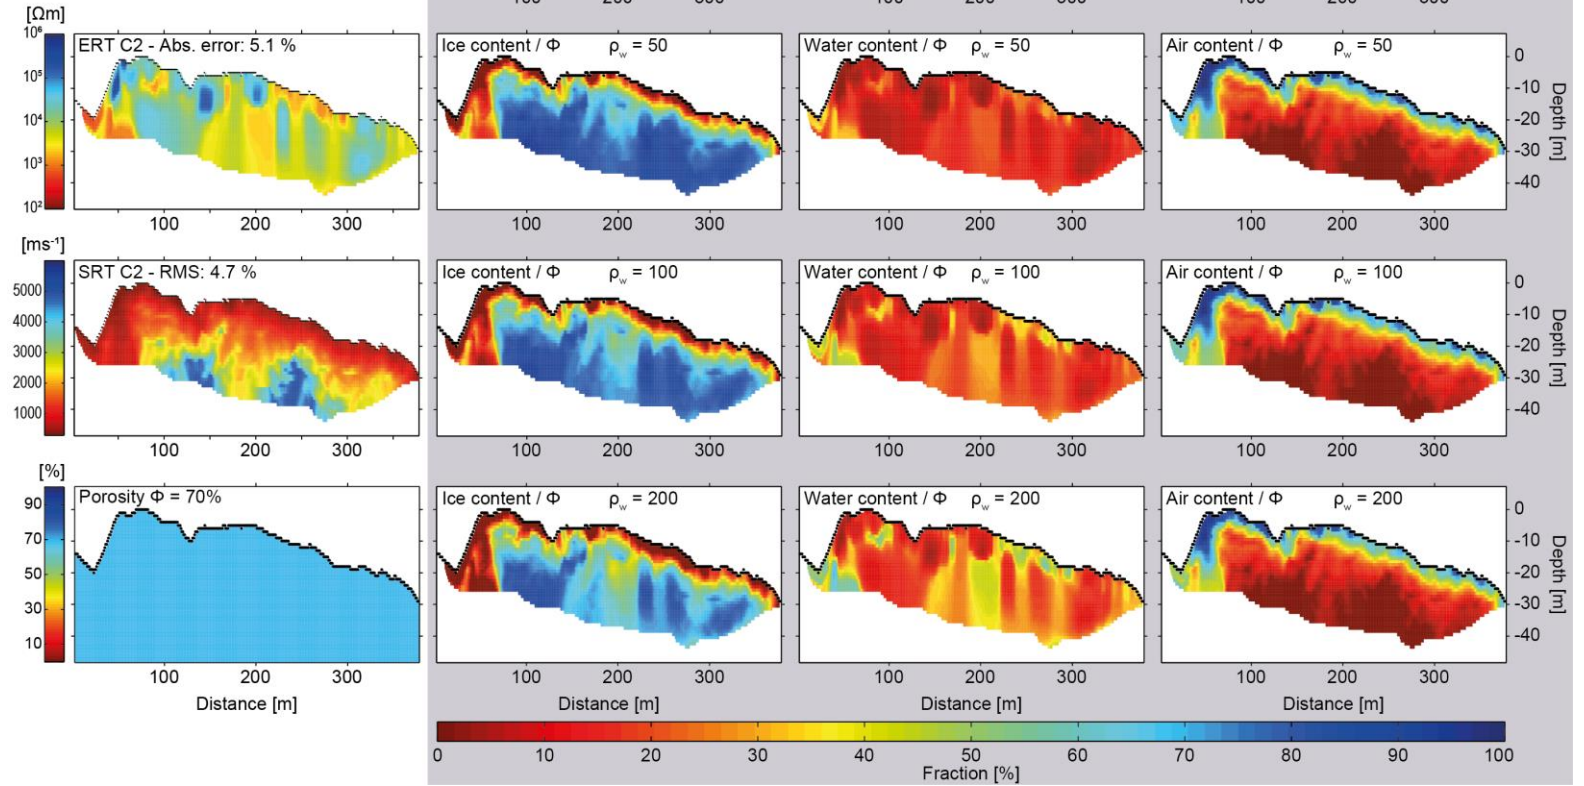

25 Fig. S 6: 4PM results of cross-profile C2 for the 70% porosity model. Ice, water and air content per porosity ( $\Phi$ ) are given for four pore water resistivities ( $\rho_w = 30, 50, 100, 200 \text{ \&Omega;m}$ ).



## 4PM Input Data

Field data Dos Lenguas cross-profile C2:  
 Electrical resistivity tomography (ERT), 27.02.2017  
 Refraction seismic tomography (SRT), 28.02.2017  
 0m depth = 4372 m asl  
 Used 4PM parameters:  
 $\Phi = 50\%$ ,  $\rho_w = 30, 50, 100 \text{ \& } 200 \text{ \Omega m}$   
 $v_{air} = 330 \text{ ms}^{-1}$ ,  $v_{water} = 1500 \text{ ms}^{-1}$ ,  $v_{ice} = 3500 \text{ ms}^{-1}$   
 Archie's law:  $a = 1$ ,  $m = 2$ ,  $n = 2$

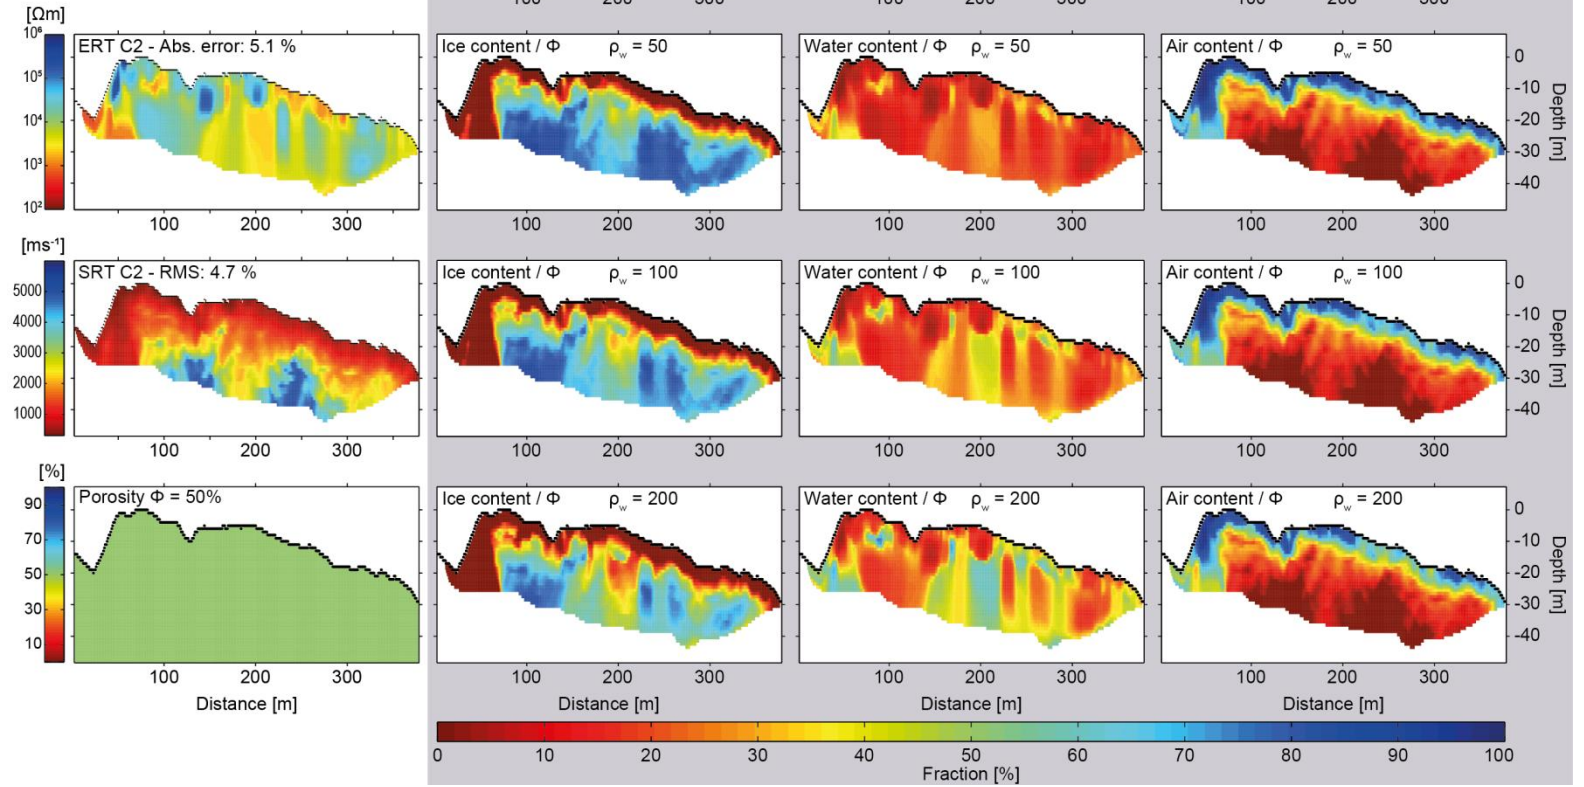

Fig. S 7: 4PM results of cross-profile C2 for the 50% porosity model. Ice, water and air content per porosity ( $\Phi$ ) are given for four pore water resistivities ( $\rho_w = 30, 50, 100, 200 \text{ \Omega m}$ ).



## 4PM Input Data

Field data Dos Lenguas cross-profile C2:  
 Electrical resistivity tomography (ERT), 27.02.2017  
 Refraction seismic tomography (SRT), 28.02.2017  
 0m depth  $\approx$  4372 m asl  
 Used 4PM parameters:  
 $\Phi = 30\%$ ,  $\rho_w = 30, 50, 100 \text{ \& } 200 \text{ \Omega m}$   
 $v_{sw} = 330 \text{ ms}^{-1}$ ,  $v_{water} = 1500 \text{ ms}^{-1}$ ,  $v_{ice} = 3500 \text{ ms}^{-1}$   
 Archie's law:  $a = 1$ ,  $m = 2$ ,  $n = 2$

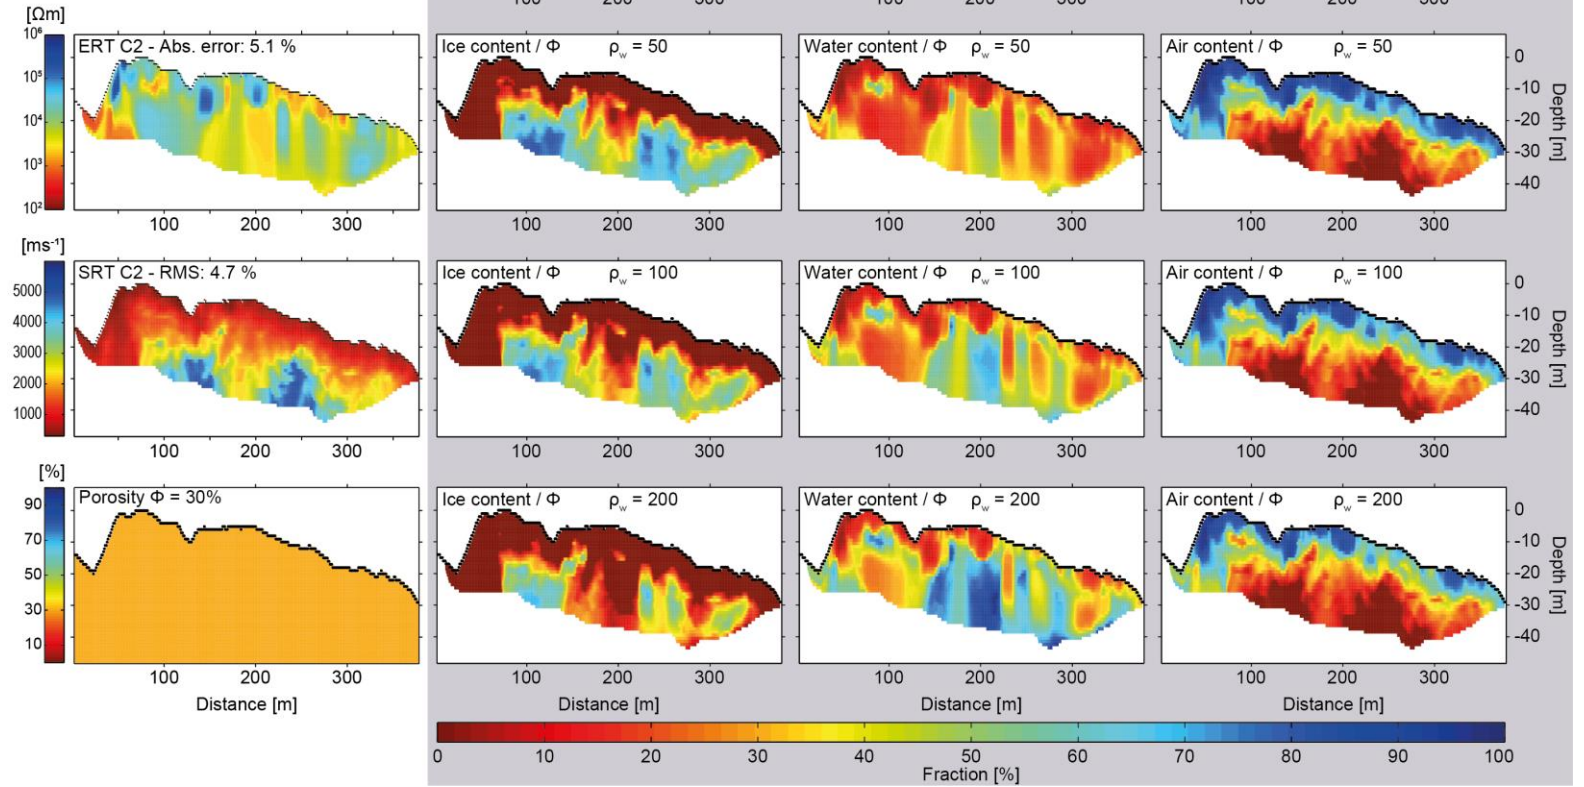

30

Fig. S 8: 4PM results of cross-profile C2 for the 30% porosity model. Ice, water and air content per porosity ( $\Phi$ ) are given for four pore water resistivities ( $\rho_w = 30, 50, 100, 200 \text{ \Omega m}$ ).

## 4PM Input Data

Field data Dos Linguas profile L1:  
 Electrical resistivity tomography (ERT), 02.03.2017  
 Seismic refraction tomography (SRT), 02.03.2017  
 0m depth = 4367 m asl

Used 4PM parameters:  
 mixed  $\Phi$ ,  $\rho_w = 30, 50, 100 \text{ \& } 200 \text{ \Omega m}$   
 $v_{air} = 330 \text{ ms}^{-1}$ ,  $v_{water} = 1500 \text{ ms}^{-1}$ ,  $v_{ice} = 3500 \text{ ms}^{-1}$   
 Archie's law:  $a = 1$ ,  $m = 2$ ,  $n = 2$

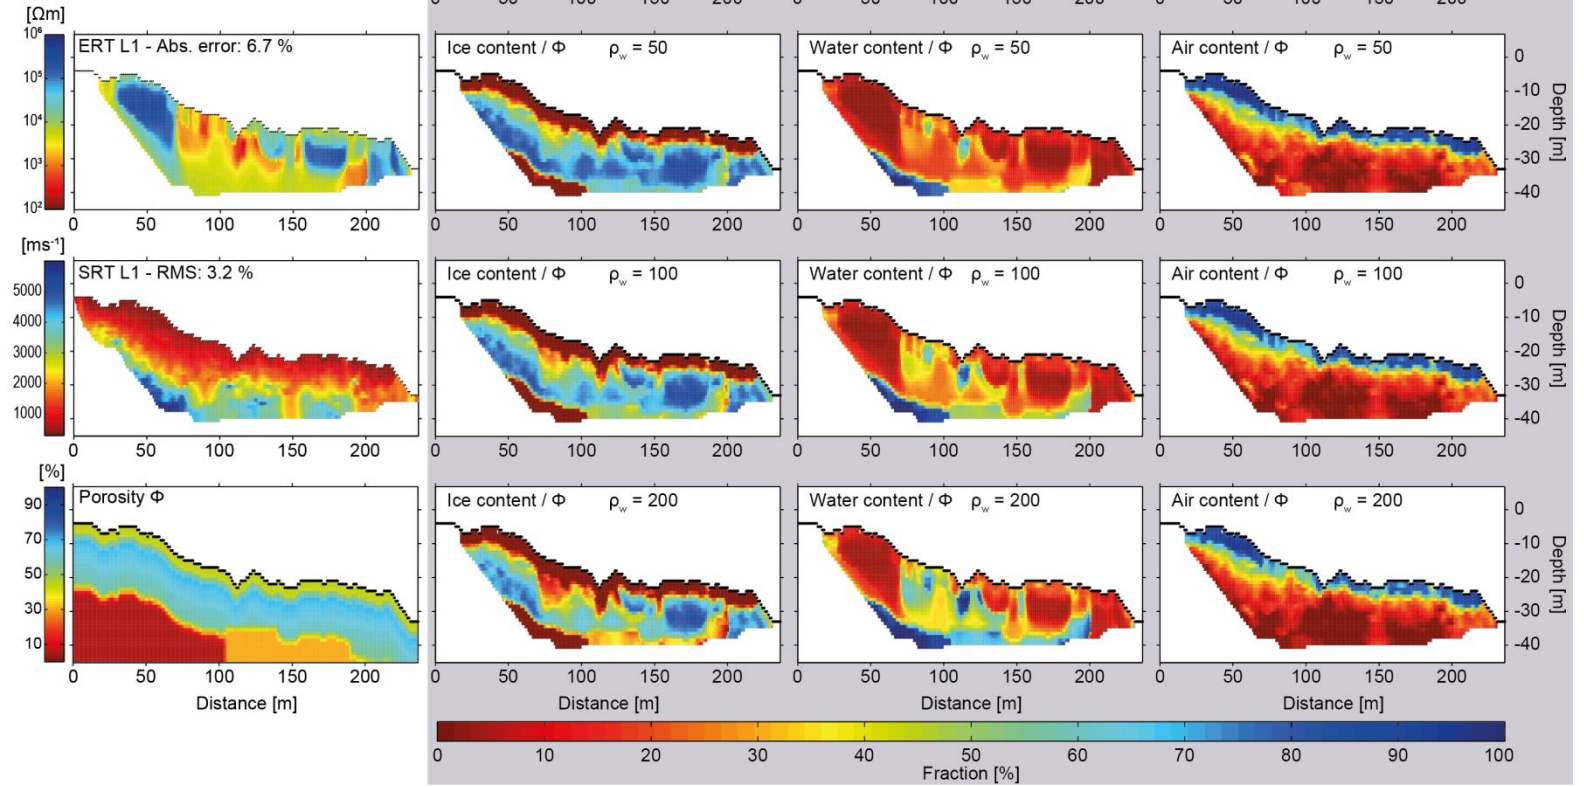

35 Fig. S 9: 4PM results of cross-profile L1 for the mixed porosity model. Ice, water and air content per porosity ( $\Phi$ ) are given for four pore water resistivities ( $\rho_w = 30, 50, 100, 200 \text{ \Omega m}$ ).

## 4PM Input Data

Field data Dos Lenguas profile L1:  
 Electrical resistivity tomography (ERT), 02.03.2017  
 Seismic refraction tomography (SRT), 02.03.2017  
 0m depth = 4367 m asl

Used 4PM parameters:  
 $\Phi = 70\%$ ,  $\rho_w = 30, 50, 100 \text{ \& } 200 \text{ \Omega m}$   
 $v_{air} = 330 \text{ ms}^{-1}$ ,  $v_{water} = 1500 \text{ ms}^{-1}$ ,  $v_{ice} = 3500 \text{ ms}^{-1}$   
 Archie's law:  $a = 1$ ,  $m = 2$ ,  $n = 2$

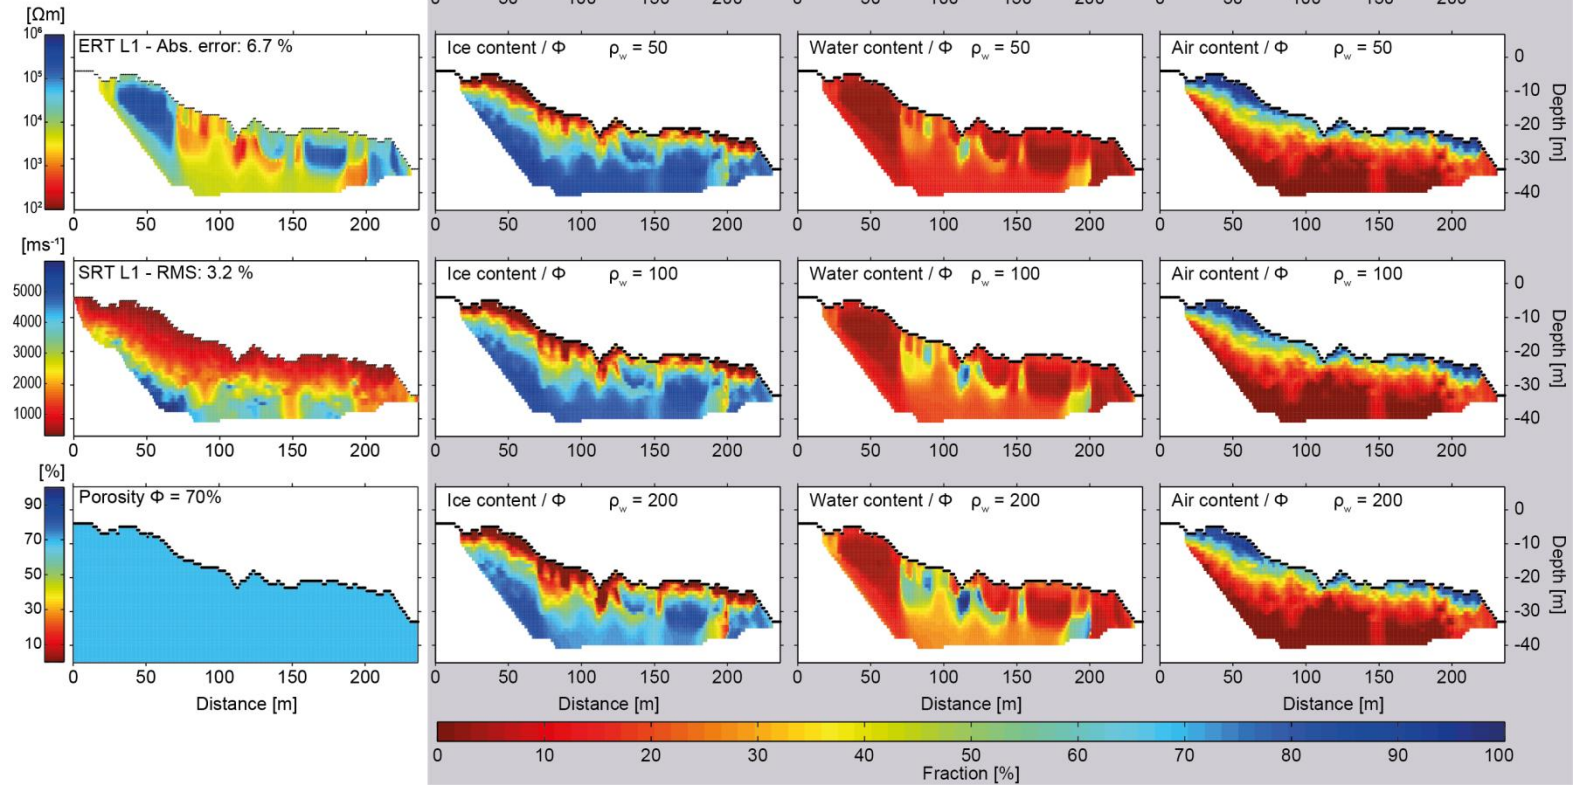

Fig. S 10: 4PM results of cross-profile L1 for the 70% porosity model. Ice, water and air content per porosity ( $\Phi$ ) are given for four pore water resistivities ( $\rho_w = 30, 50, 100, 200 \text{ \Omega m}$ ).



## 4PM Input Data

Field data Dos Lenguas profile L1:  
 Electrical resistivity tomography (ERT), 02.03.2017  
 Seismic refraction tomography (SRT), 02.03.2017  
 0m depth = 4367 m asl  
 Used 4PM parameters:  
 $\Phi = 50\%$ ,  $\rho_w = 30, 50, 100 \text{ \& } 200 \text{ \Omega m}$   
 $v_{\text{air}} = 330 \text{ ms}^{-1}$ ,  $v_{\text{water}} = 1500 \text{ ms}^{-1}$ ,  $v_{\text{ice}} = 3500 \text{ ms}^{-1}$   
 Archie's law:  $a = 1$ ,  $m = 2$ ,  $n = 2$

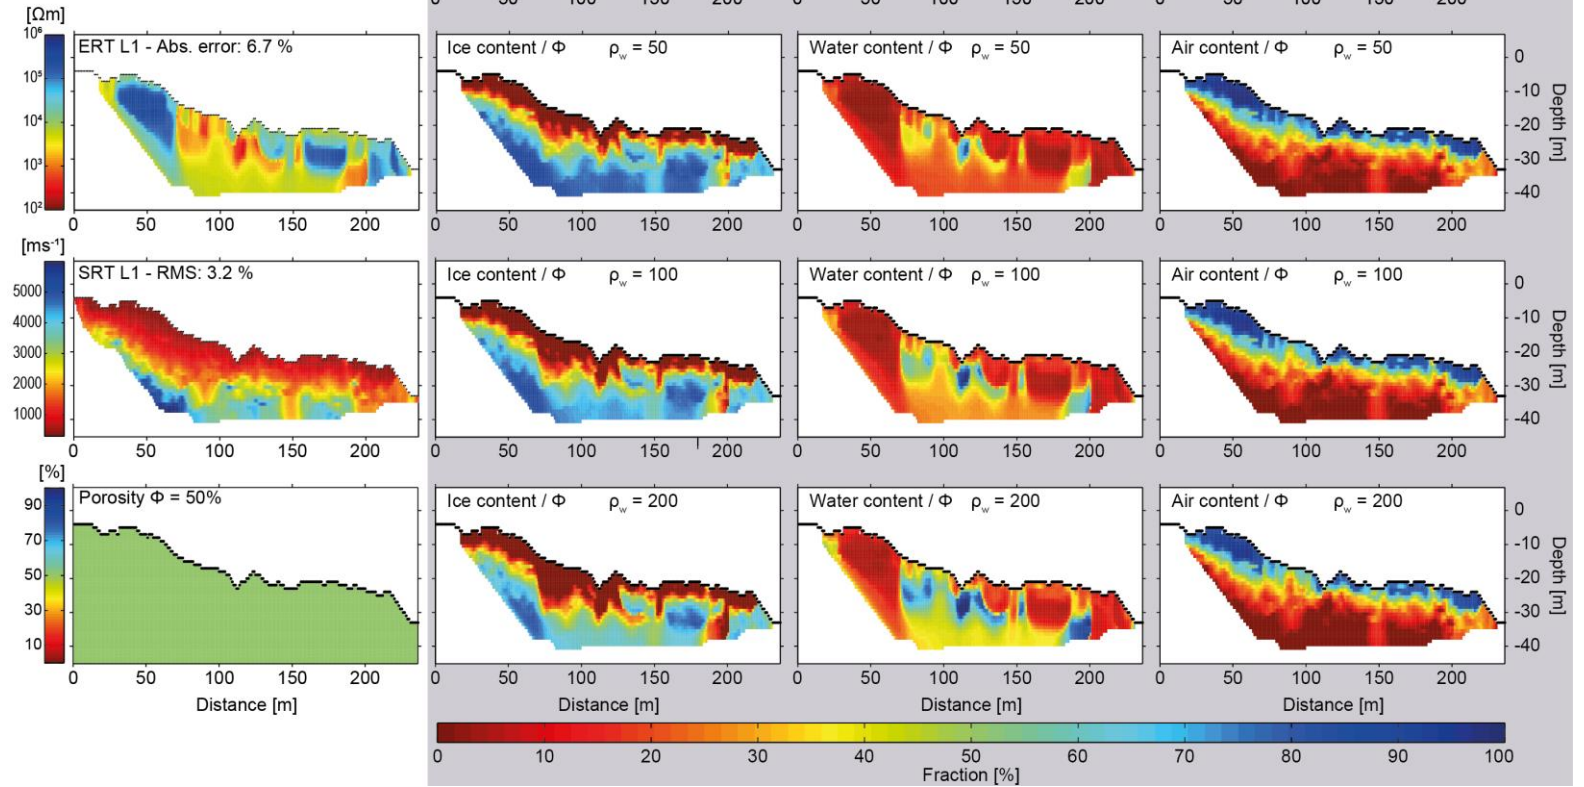

40 Fig. S 11: 4PM results of cross-profile L1 for the 50% porosity model. Ice, water and air content per porosity ( $\Phi$ ) are given for four pore water resistivities ( $\rho_w = 30, 50, 100, 200 \text{ \Omega m}$ ).

## 4PM Input Data

Field data Dos Lenguas profile L1:  
 Electrical resistivity tomography (ERT), 02.03.2017  
 Seismic refraction tomography (SRT), 02.03.2017  
 0m depth = 4367 m asl  
 Used 4PM parameters:  
 $\Phi = 30\%$ ,  $\rho_w = 30, 50, 100 \text{ \& } 200 \text{ \Omega m}$   
 $v_{sw} = 330 \text{ ms}^{-1}$ ,  $v_{water} = 1500 \text{ ms}^{-1}$ ,  $v_{ice} = 3500 \text{ ms}^{-1}$   
 Archie's law:  $a = 1$ ,  $m = 2$ ,  $n = 2$

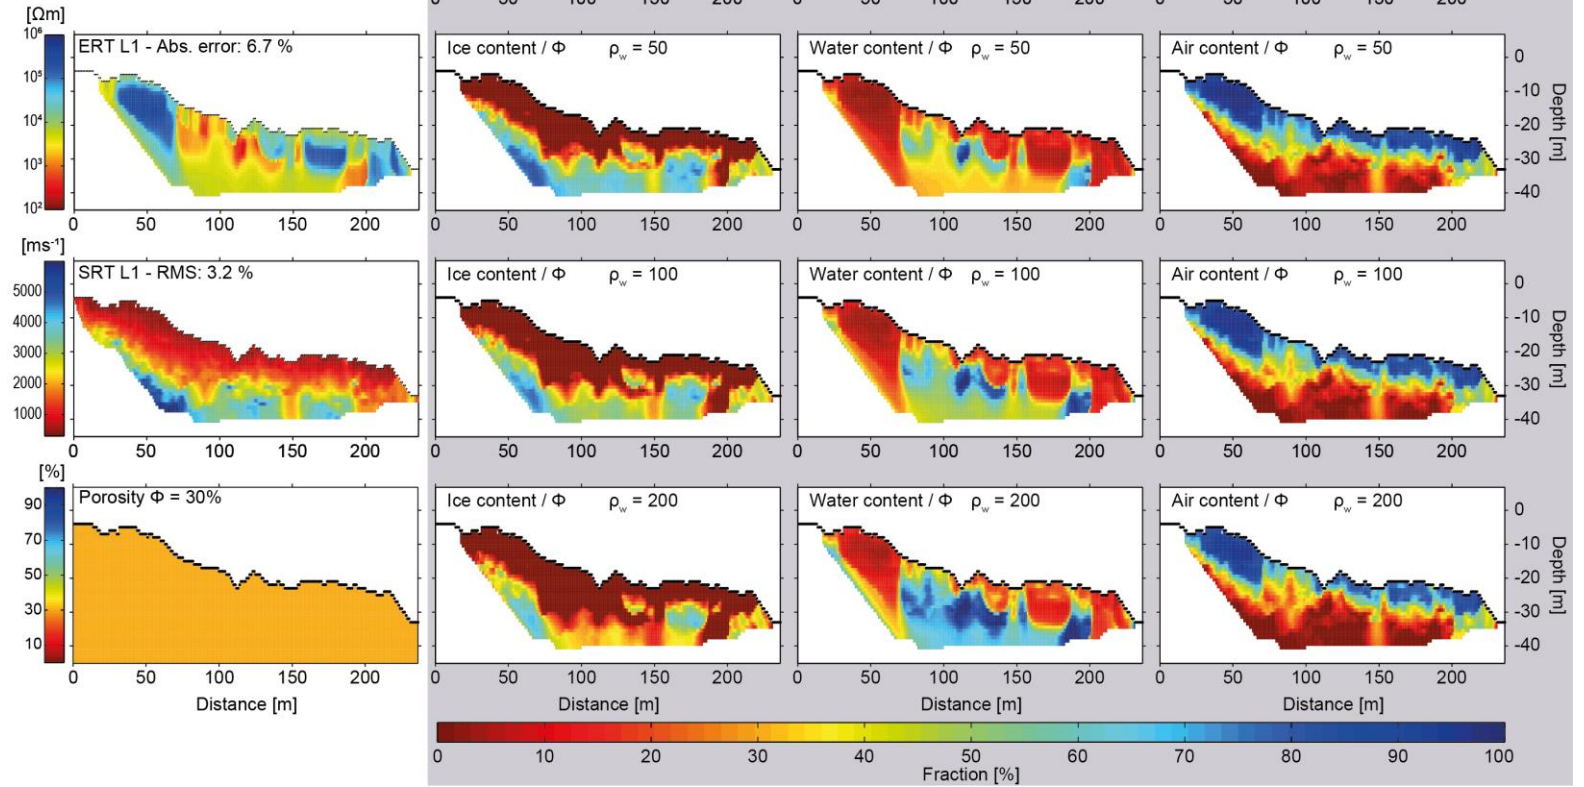

Fig. S 12: 4PM results of cross-profile L1 for the 30% porosity model. Ice, water and air content per porosity ( $\Phi$ ) are given for four pore water resistivities ( $\rho_w = 30, 50, 100, 200 \text{ \Omega m}$ ).

## 4PM Input Data

Field data Dos Linguas profile L2:  
 Electrical resistivity tomography (ERT), 01.03.2018  
 Seismic refraction tomography (SRT), 02.03.2018  
 0m depth = 4370 m asl  
 Used 4PM parameters:  
 mixed  $\Phi$ ,  $\rho_w = 30, 50, 100 \text{ \&Omega;m}$   
 $v_{air} = 330 \text{ ms}^{-1}$ ,  $v_{water} = 1500 \text{ ms}^{-1}$ ,  $v_{ice} = 3500 \text{ ms}^{-1}$   
 Archie's law:  $a = 1$ ,  $m = 2$ ,  $n = 2$

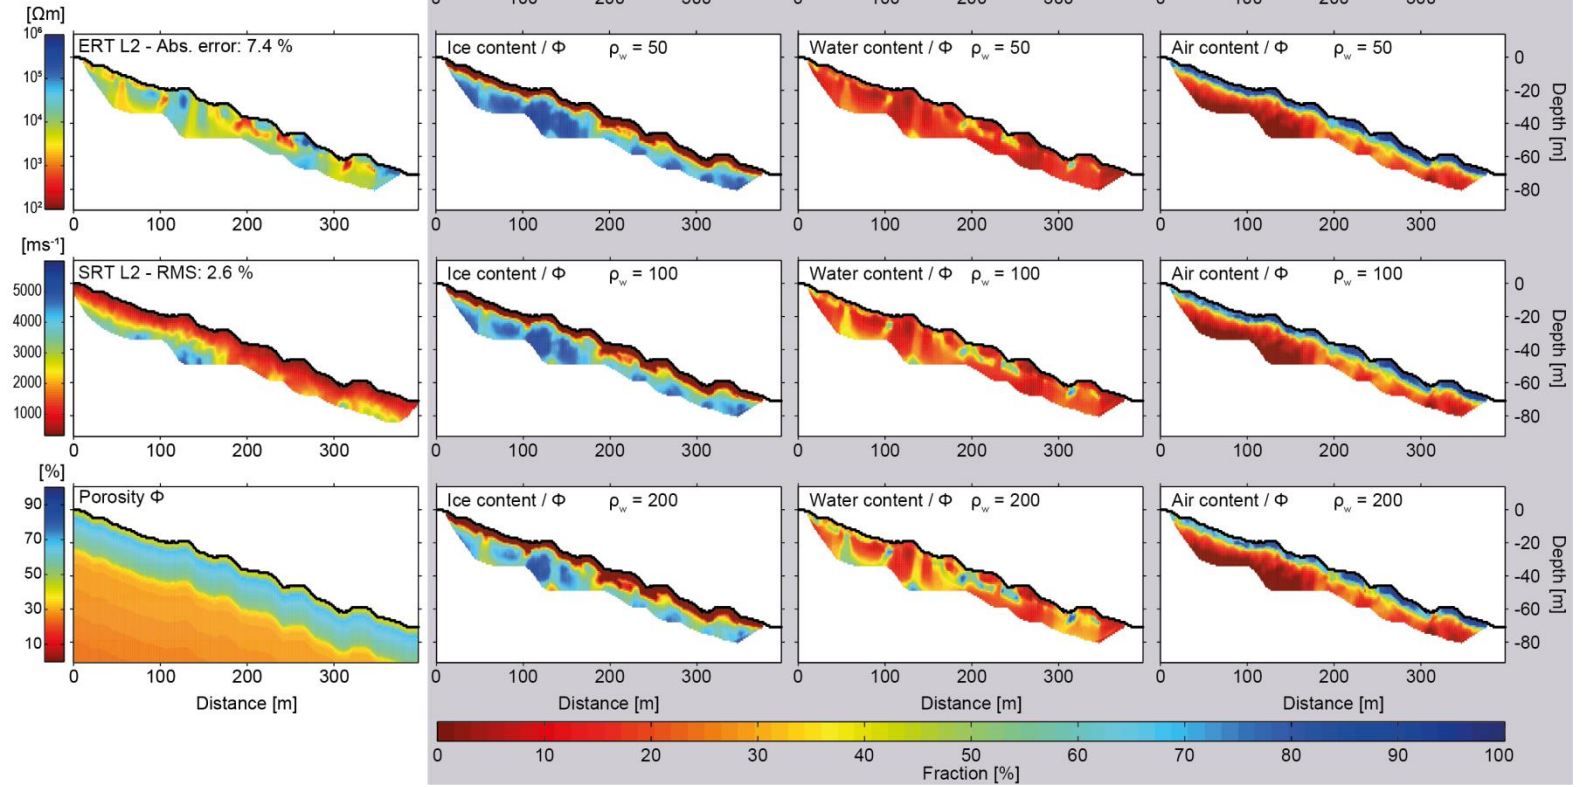

45

Fig. S 13: 4PM results of cross-profile L2 for the mixed porosity model. Ice, water and air content per porosity ( $\Phi$ ) are given for four pore water resistivities ( $\rho_w = 30, 50, 100, 200 \text{ \&Omega;m}$ ).



## 4PM Input Data

Field data Dos Lenguas profile L2:  
 Electrical resistivity tomography (ERT), 01.03.2018  
 Seismic refraction tomography (SRT), 02.03.2018  
 0m depth = 4370 m asl  
 Used 4PM parameters:  
 $\Phi = 70\%$ ,  $\rho_w = 30, 50, 100 \text{ \&Omega}m$   
 $v_{air} = 330 \text{ ms}^{-1}$ ,  $v_{water} = 1500 \text{ ms}^{-1}$ ,  $v_{ice} = 3500 \text{ ms}^{-1}$   
 Archie's law:  $a = 1$ ,  $m = 2$ ,  $n = 2$

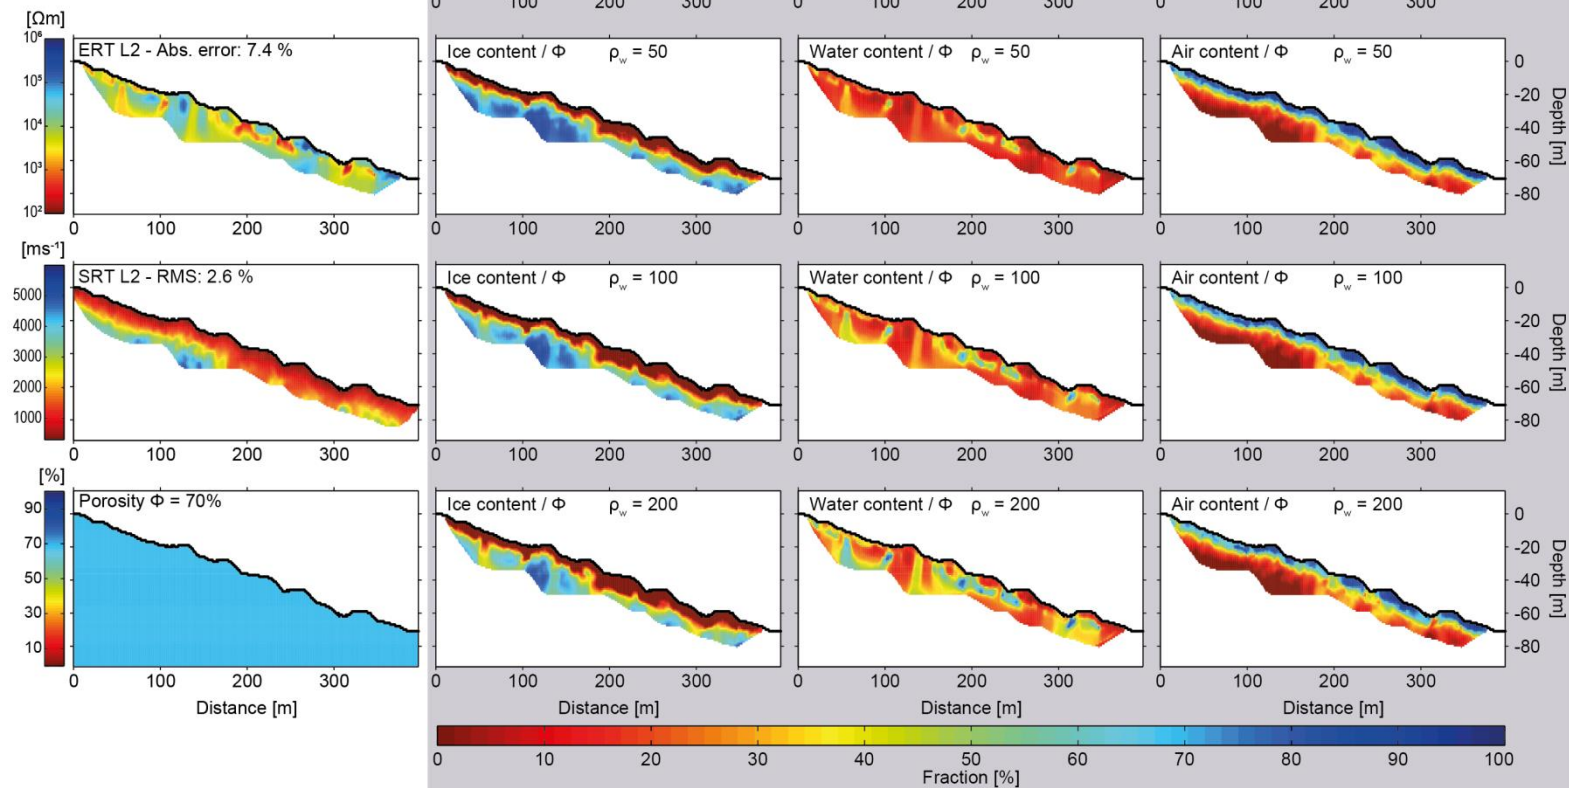

50 Fig. S 14: 4PM results of cross-profile L2 for the 70% porosity model. Ice, water and air content per porosity ( $\Phi$ ) are given for four pore water resistivities ( $\rho_w = 30, 50, 100, 200 \Omega m$ ).

## 4PM Input Data

Field data Dos Lenguas profile L2:  
 Electrical resistivity tomography (ERT), 01.03.2018  
 Seismic refraction tomography (SRT), 02.03.2018  
 0m depth = 4370 m asl  
 Used 4PM parameters:  
 $\Phi = 50\%$ ,  $\rho_w = 30, 50, 100 \text{ \&Omega}m$   
 $v_{sw} = 330 \text{ ms}^{-1}$ ,  $v_{water} = 1500 \text{ ms}^{-1}$ ,  $v_{ice} = 3500 \text{ ms}^{-1}$   
 Archie's law:  $a = 1$ ,  $m = 2$ ,  $n = 2$

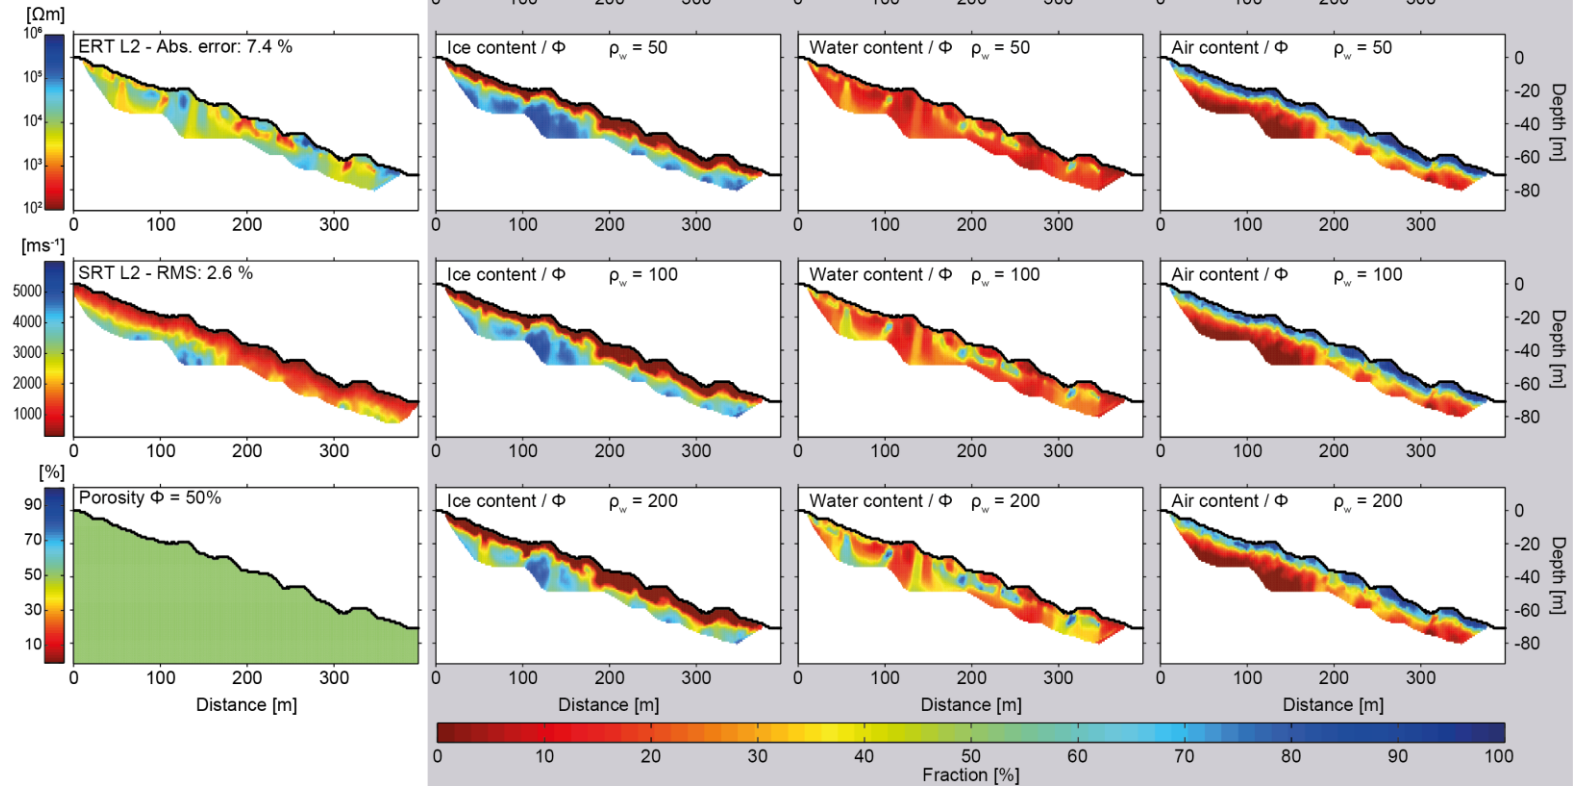

Fig. S 15: 4PM results of cross-profile L2 for the 50% porosity model. Ice, water and air content per porosity ( $\Phi$ ) are given for four pore water resistivities ( $\rho_w = 30, 50, 100, 200 \Omega m$ ).

## 4PM Input Data

Field data Dos Lenguas profile L2:  
 Electrical resistivity tomography (ERT), 01.03.2018  
 Seismic refraction tomography (SRT), 02.03.2018  
 0m depth = 4370 m asl  
 Used 4PM parameters:  
 $\Phi = 30\%$ ,  $\rho_w = 30, 50, 100 \text{ \&Omega}m$   
 $v_{sw} = 330 \text{ ms}^{-1}$ ,  $v_{water} = 1500 \text{ ms}^{-1}$ ,  $v_{ice} = 3500 \text{ ms}^{-1}$   
 Archie's law:  $a = 1$ ,  $m = 2$ ,  $n = 2$

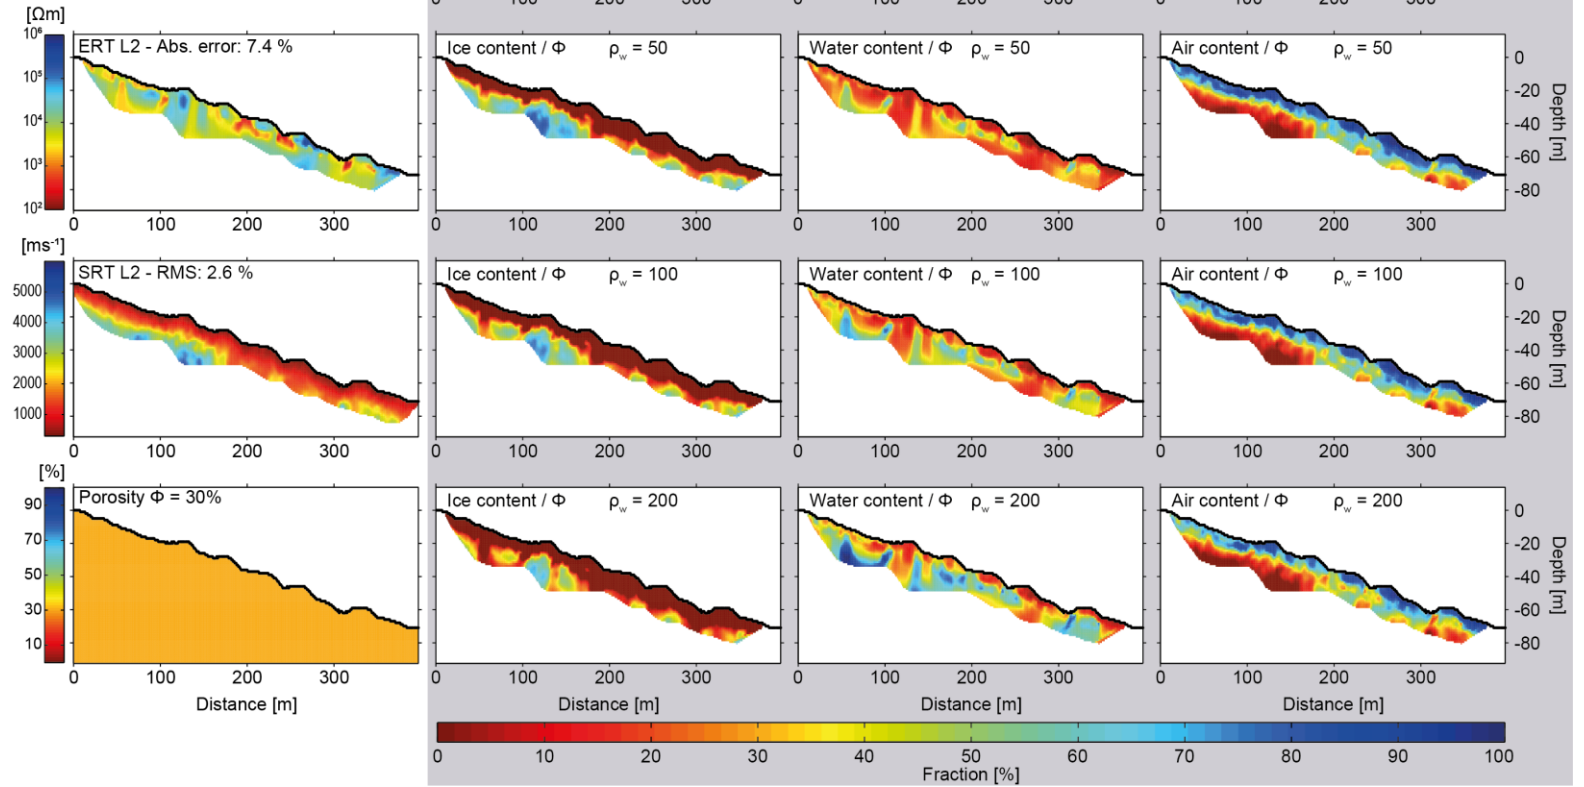

55 Fig. S 16: 4PM results of cross-profile L2 for the 30% porosity model. Ice, water and air content per porosity ( $\Phi$ ) are given for four pore water resistivities ( $\rho_w = 30, 50, 100, 200 \Omega m$ ).



## S2 Ground surface temperatures of Dos Lenguas rock glacier

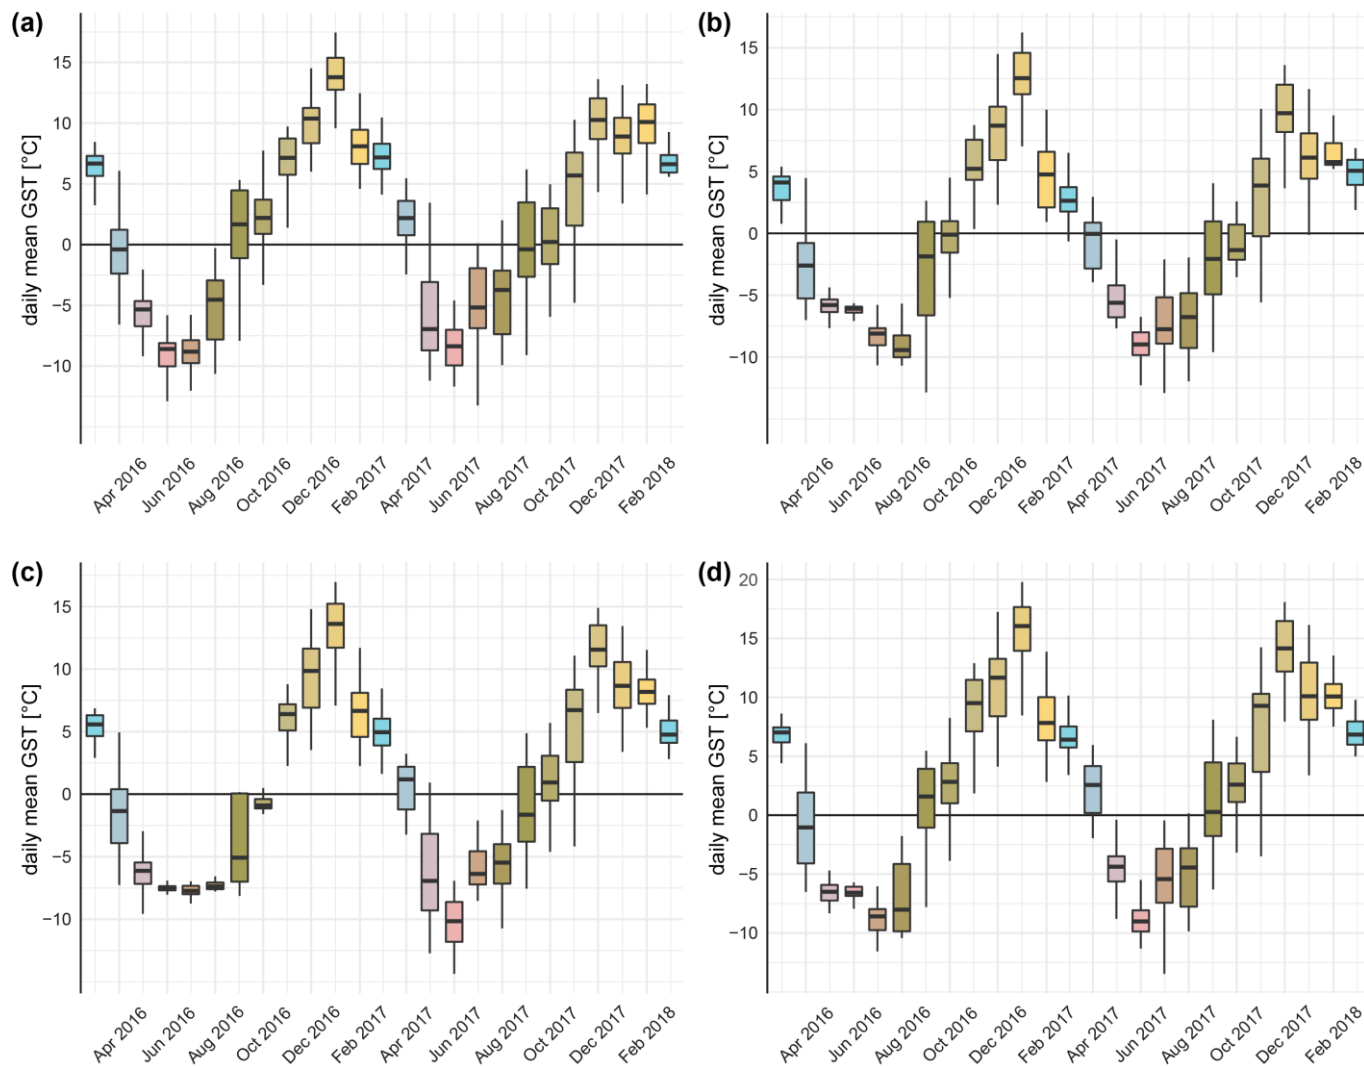

60

**Fig. S 17: Boxplots of daily mean ground surface temperatures (GST) from Mar 2016 to Mar 2018 measured with iButtons in three hour intervals at four different locations of Dos Lenguas rock glacier ((a), (b), (c), and (d)). The ground surface temperature regime during the ablation period between Sep 2016 and Mar 2017 shows an earlier and warmer spring (Sep 2016) and a later and higher temperature maximum during summer (Jan 2107) compared to the ablation period 2017-18.**
